# Supplementary material for: Biomimetic polysaccharide-cloaked lipidic nanovesicles/microassemblies for improving the enzymatic activity and prolonging the action time for hyperuricemia treatment
Source: Royal Society of Chemistry journal article supplement (doi:10.1039/d0nr02651d), 2020-01-01
Supplement: d0nr02651d1.pdf [file d0nr02651d1.pdf]

## Supporting Information

Biomimetic polysaccharide-cloaked lipidic  
nanovesicles/microassemblies improve the enzymatic activity  
and prolong the action time for hyperuricemia treatment

**Supplementary Information includes:**

**Supplementary Table S1-S10**

**Supplementary Figure S1**

### **Supplementary Table S1-S10**

**Table S1.** Entrapment efficiency, size, polydispersity index and zeta potential of UHLN and UHLNM.

**Table S2.** Fluorescence changes of Uase and BHLN and BHLNM.

**Table S3.** FITC fluorescence changes of Uase, UHLN and UHLNM were induced by heat treatment at 25°C and 55°C.

**Table S4.** Fluorescence intensity at maximum wavelength when the mixture of Uase and BSA was set at different ratios.

**Table S5.** Fluorescence intensity at maximum wavelength when the mixture of UHLN and BSA was set at different ratios.

**Table S6.** Fluorescence intensity at maximum wavelength when the mixture of UHLNM and BSA was set at different ratios.

**Table S7.** Fluorescence intensity at maximum wavelength when the mixture of BHLN and BSA was set at different ratios.

**Table S8.** Fluorescence intensity at maximum wavelength when the mixture of BHLNM and BSA was set at different ratios.

**Table S9.** Fluorescence intensity at maximum wavelength when the mixture of Uase, BHLN and BSA was set at different ratios.

**Table S10.** Fluorescence intensity at maximum wavelength when the mixture of Uase, BHLNM and BSA was set at different ratios.

**Table S1.** Entrapment efficiency, size, polydispersity index and zeta potential of UHLN and UHLNM.

| Formulation | Entrapment efficiency (%) | Size            | Polydispersity index | Zeta potential (mV) |
|-------------|---------------------------|-----------------|----------------------|---------------------|
| UHLN        | 57.27 ± 3.93              | 322.60 ± 8.2 nm | 0.24 ± 0.027         | -19.37 ± 1.80       |
| UHLNM       | 62.48 ± 3.87              | 27.00 ± 1.12 μm | -                    | -23.50 ± 8.57       |

Notes: data were presented as mean ± standard deviation (n=3).

**Table S2.** Fluorescence changes of Uase and BHLN and BHLNM.

| Formulation | $\lambda_{\max}^a$ | $F_1^b$ | $F_1^c$ | $F_1^b - F_1^c$ |
|-------------|--------------------|---------|---------|-----------------|
| Uase        | 330 nm             | 872.195 | -       | -               |
| BHLN        | 325 nm             | -       | 107.533 | 764.662         |
| Uase+BHLN   | 327 nm             | -       | 979.728 | -107.533        |
| Uase        | 330 nm             | 872.195 | -       | -               |
| BHLNM       | 365 nm             | -       | 100.730 | 771.465         |
| Uase+BHLNM  | 330 nm             | -       | 972.925 | -100.73         |

<sup>a</sup>Fluorescence maximum wavelength of Uase, BHLN, BHLNM and their mixture

<sup>b</sup>Fluorescence intensity of Uase at maximum wavelength

<sup>c</sup>Fluorescence intensity of BHLN, BHLNM and their mixture (Uase+BHLN or Uase+BHLNM) at maximum wavelength

**Table S3.** FITC fluorescence changes of Uase, UHLN and UHLNM were induced by heat treatment at 25°C and 55°C.

| Formulation | 25°C               |         | 55°C        |                    |         | $F_1^b - F_1^c$ |
|-------------|--------------------|---------|-------------|--------------------|---------|-----------------|
|             | $\lambda_{\max}^a$ | $F_1^b$ | Formulation | $\lambda_{\max}^a$ | $F_1^c$ |                 |
| Uase        | 519 nm             | 717.767 | Uase        | 520 nm             | 531.295 | 186.472         |
| UHLN        | 522 nm             | 783.496 | UHLN        | 520 nm             | 731.444 | 52.052          |
| UHLNM       | 521 nm             | 790.895 | UHLNM       | 520 nm             | 778.141 | 12.754          |

<sup>a</sup>Fluorescence maximum wavelength of Uase, UHLNX

<sup>b</sup>Fluorescence intensity of Uase and UHLNX at maximum wavelength when treated at 25°C

<sup>c</sup>Fluorescence intensity of Uase and UHLNX at maximum wavelength when treated at 55°C

**Table S4.** Fluorescence intensity at maximum wavelength when the mixture of Uase and BSA was set at different ratios.

| Uase          |                               |                             | Mixture of Uase and BSA |                               |                             | F <sub>3</sub> <sup>e</sup> |
|---------------|-------------------------------|-----------------------------|-------------------------|-------------------------------|-----------------------------|-----------------------------|
| Concentration | $\lambda_{\max}$ <sup>a</sup> | F <sub>1</sub> <sup>b</sup> | Ratio (BSA:Uase)        | $\lambda_{\max}$ <sup>c</sup> | F <sub>2</sub> <sup>d</sup> |                             |
| -             | -                             | -                           | 1:0 (BSA 1.0 $\mu$ M)   | 340 nm                        | 129.540                     | -                           |
| 0.5 $\mu$ M   | 332 nm                        | 143.263                     | 1:0.5                   | 335 nm                        | 255.077                     | 272.803                     |
| 1.0 $\mu$ M   | 329 nm                        | 299.790                     | 1:1.0                   | 333 nm                        | 395.433                     | 429.330                     |
| 1.5 $\mu$ M   | 332 nm                        | 421.945                     | 1:1.5                   | 334 nm                        | 533.739                     | 551.485                     |
| 2.0 $\mu$ M   | 331 nm                        | 555.033                     | 1:2.0                   | 334 nm                        | 637.283                     | 684.573                     |
| 2.5 $\mu$ M   | 330 nm                        | 702.846                     | 1:2.5                   | 331 nm                        | 772.700                     | 832.386                     |
| 3.0 $\mu$ M   | 330 nm                        | 771.515                     | 1:3.0                   | 333 nm                        | 863.311                     | 901.055                     |
| 3.5 $\mu$ M   | 330 nm                        | 872.195                     | 1:3.5                   | 333 nm                        | 934.539                     | 1001.735                    |

<sup>a</sup>Fluorescence maximum wavelength of Uase

<sup>b</sup>Fluorescence intensity of Uase at maximum wavelength

<sup>c</sup>Fluorescence maximum wavelength of BSA or the mixture of Uase and BSA

<sup>d</sup>Fluorescence intensity of mixture of Uase and BSA at maximum wavelength

<sup>e</sup>Fluorescence intensity of Uase plus fluorescence intensity of BSA at maximum wavelength

**Table S5.** Fluorescence intensity at maximum wavelength when the mixture of UHLN and BSA was set at different ratios.

| UHLN          |                               |                             | Mixture of UHLN and BSA |                               |                             | F <sub>3</sub> <sup>e</sup> |
|---------------|-------------------------------|-----------------------------|-------------------------|-------------------------------|-----------------------------|-----------------------------|
| Concentration | $\lambda_{\max}$ <sup>a</sup> | F <sub>1</sub> <sup>b</sup> | Ratio (BSA:UHLN)        | $\lambda_{\max}$ <sup>c</sup> | F <sub>2</sub> <sup>d</sup> |                             |
| -             | -                             | -                           | 1:0 (BSA 1.0 $\mu$ M)   | 340 nm                        | 129.540                     | -                           |
| 0.5 $\mu$ M   | 332 nm                        | 203.566                     | 1:0.5                   | 331 nm                        | 234.444                     | 333.106                     |
| 1.0 $\mu$ M   | 332 nm                        | 312.642                     | 1:1.0                   | 330 nm                        | 338.334                     | 442.482                     |
| 1.5 $\mu$ M   | 330 nm                        | 411.609                     | 1:1.5                   | 331 nm                        | 433.256                     | 541.149                     |
| 2.0 $\mu$ M   | 332 nm                        | 479.060                     | 1:2.0                   | 330 nm                        | 480.278                     | 608.600                     |
| 2.5 $\mu$ M   | 331 nm                        | 513.922                     | 1:2.5                   | 332 nm                        | 516.274                     | 643.462                     |
| 3.0 $\mu$ M   | 329 nm                        | 527.409                     | 1:3.0                   | 328 nm                        | 549.269                     | 656.949                     |
| 3.5 $\mu$ M   | 329 nm                        | 556.486                     | 1:3.5                   | 331 nm                        | 588.517                     | 686.060                     |

<sup>a</sup>Fluorescence maximum wavelength of UHLN

<sup>b</sup>Fluorescence intensity of UHLN at maximum wavelength

<sup>c</sup>Fluorescence maximum wavelength of BSA or the mixture of UHLN and BSA

<sup>d</sup>Fluorescence intensity of mixture of UHLN and BSA at maximum wavelength

<sup>e</sup>Fluorescence intensity of UHLN plus fluorescence intensity of BSA at maximum wavelength

**Table S6.** Fluorescence intensity at maximum wavelength when the mixture of UHLNM and BSA was set at different ratios.

| UHLNM         |                               |                             | Mixture of UHLNM and BSA |                               |                             | F <sub>3</sub> <sup>e</sup> |
|---------------|-------------------------------|-----------------------------|--------------------------|-------------------------------|-----------------------------|-----------------------------|
| Concentration | $\lambda_{\max}$ <sup>a</sup> | F <sub>1</sub> <sup>b</sup> | Ratio(BSA:UHLNM)         | $\lambda_{\max}$ <sup>c</sup> | F <sub>2</sub> <sup>d</sup> |                             |
| -             | -                             | -                           | 1:0 (BSA 1.0 $\mu$ M)    | 340 nm                        | 129.540                     | -                           |
| 0.5 $\mu$ M   | 331 nm                        | 167.514                     | 1:0.5                    | 331 nm                        | 250.267                     | 297.054                     |
| 1.0 $\mu$ M   | 330 nm                        | 265.625                     | 1:1.0                    | 333 nm                        | 311.586                     | 395.165                     |
| 1.5 $\mu$ M   | 331 nm                        | 320.58                      | 1:1.5                    | 331 nm                        | 361.899                     | 450.12                      |
| 2.0 $\mu$ M   | 331 nm                        | 367.362                     | 1:2.0                    | 329 nm                        | 381.593                     | 496.902                     |
| 2.5 $\mu$ M   | 328 nm                        | 381.879                     | 1:2.5                    | 329 nm                        | 416.263                     | 511.419                     |
| 3.0 $\mu$ M   | 329 nm                        | 399.533                     | 1:3.0                    | 330 nm                        | 421.516                     | 529.073                     |
| 3.5 $\mu$ M   | 328 nm                        | 412.663                     | 1:3.5                    | 328 nm                        | 427.745                     | 542.203                     |

<sup>a</sup>Fluorescence maximum wavelength of UHLNM

<sup>b</sup>Fluorescence intensity of UHLNM at maximum wavelength

<sup>c</sup>Fluorescence maximum wavelength of BSA or the mixture of UHLNM and BSA

<sup>d</sup>Fluorescence intensity of mixture of UHLNM and BSA at maximum wavelength

<sup>e</sup>Fluorescence intensity of UHLNM plus fluorescence intensity of BSA at maximum wavelength

**Table S7.** Fluorescence intensity at maximum wavelength when the mixture of BHLN and BSA was set at different ratios.

| BHLN          |                               |                             | Mixture of BHLN and BSA |                               |                             | F <sub>3</sub> <sup>e</sup> |
|---------------|-------------------------------|-----------------------------|-------------------------|-------------------------------|-----------------------------|-----------------------------|
| Concentration | $\lambda_{\max}$ <sup>a</sup> | F <sub>1</sub> <sup>b</sup> | Ratio (BSA:BHLN)        | $\lambda_{\max}$ <sup>c</sup> | F <sub>2</sub> <sup>d</sup> |                             |
| -             | -                             | -                           | 1:0 (BSA 1.0 $\mu$ M)   | 340 nm                        | 129.540                     | -                           |
| 0.5 $\mu$ M   | 325 nm                        | 36.828                      | 1:0.5                   | 334 nm                        | 113.328                     | 166.368                     |
| 1.0 $\mu$ M   | 322 nm                        | 60.717                      | 1:1.0                   | 336 nm                        | 119.813                     | 190.257                     |
| 1.5 $\mu$ M   | 328 nm                        | 71.429                      | 1:1.5                   | 332 nm                        | 123.716                     | 200.969                     |
| 2.0 $\mu$ M   | 326 nm                        | 81.786                      | 1:2.0                   | 327 nm                        | 126.436                     | 211.326                     |
| 2.5 $\mu$ M   | 328 nm                        | 91.928                      | 1:2.5                   | 327 nm                        | 131.391                     | 221.468                     |
| 3.0 $\mu$ M   | 329 nm                        | 97.161                      | 1:3.0                   | 329 nm                        | 131.429                     | 226.701                     |
| 3.5 $\mu$ M   | 325 nm                        | 107.533                     | 1:3.5                   | 327 nm                        | 135.443                     | 237.073                     |

<sup>a</sup>Fluorescence maximum wavelength of BHLN

<sup>b</sup>Fluorescence intensity of BHLN at maximum wavelength

<sup>c</sup>Fluorescence maximum wavelength of BSA or the mixture of BHLN and BSA

<sup>d</sup>Fluorescence intensity of mixture of BHLN and BSA at maximum wavelength

<sup>e</sup>Fluorescence intensity of BHLN plus fluorescence intensity of BSA at maximum wavelength

**Table S8.** Fluorescence intensity at maximum wavelength when the mixture of BHLNM and BSA was set at different ratios.

| BHLNM         |                               |                             | Mixture of BHLNM and BSA |                               |                             | F <sub>3</sub> <sup>e</sup> |
|---------------|-------------------------------|-----------------------------|--------------------------|-------------------------------|-----------------------------|-----------------------------|
| Concentration | $\lambda_{\max}$ <sup>a</sup> | F <sub>1</sub> <sup>b</sup> | Ratio(BSA:UHLNM)         | $\lambda_{\max}$ <sup>c</sup> | F <sub>2</sub> <sup>d</sup> |                             |
| -             | -                             | -                           | 1:0 (BSA 1.0 $\mu$ M)    | 340 nm                        | 129.540                     | -                           |
| 0.5 $\mu$ M   | 330 nm                        | 46.184                      | 1:0.5                    | 333 nm                        | 95.902                      | 175.724                     |
| 1.0 $\mu$ M   | 359 nm                        | 53.127                      | 1:1.0                    | 332 nm                        | 103.229                     | 182.667                     |
| 1.5 $\mu$ M   | 290 nm                        | 63.155                      | 1:1.5                    | 335 nm                        | 109.762                     | 192.695                     |
| 2.0 $\mu$ M   | 290 nm                        | 73.192                      | 1:2.0                    | 332 nm                        | 113.652                     | 202.732                     |
| 2.5 $\mu$ M   | 365 nm                        | 84.659                      | 1:2.5                    | 332 nm                        | 114.085                     | 214.199                     |
| 3.0 $\mu$ M   | 367 nm                        | 93.589                      | 1:3.0                    | 328 nm                        | 117.809                     | 223.129                     |
| 3.5 $\mu$ M   | 365 nm                        | 100.73                      | 1:3.5                    | 365 nm                        | 120.829                     | 230.270                     |

<sup>a</sup>Fluorescence maximum wavelength of BHLNM

<sup>b</sup>Fluorescence intensity of BHLNM at maximum wavelength

<sup>c</sup>Fluorescence maximum wavelength of BSA or the mixture of BHLNM and BSA

<sup>d</sup>Fluorescence intensity of mixture of BHLNM and BSA at maximum wavelength

<sup>e</sup>Fluorescence intensity of BHLNM plus fluorescence intensity of BSA at maximum wavelength

**Table S9.** Fluorescence intensity at maximum wavelength when the mixture of Uase, BHLN and BSA was set at different ratios.

| BHLN+Uase     |                               |                             | Mixture of BHLN, Uase and BSA |                               |                             | F <sub>3</sub> <sup>e</sup> |
|---------------|-------------------------------|-----------------------------|-------------------------------|-------------------------------|-----------------------------|-----------------------------|
| Concentration | $\lambda_{\max}$ <sup>a</sup> | F <sub>1</sub> <sup>b</sup> | Ratio<br>(BSA:BHLN:Uase)      | $\lambda_{\max}$ <sup>c</sup> | F <sub>2</sub> <sup>d</sup> |                             |
| -             | -                             | -                           | 1:0 (BSA 1.0 $\mu$ M)         | 340 nm                        | 129.540                     | -                           |
| 0.5 $\mu$ M   | 332 nm                        | 180.091                     | 1:0.5:0.5                     | 332 nm                        | 234.270                     | 498.368                     |
| 1.0 $\mu$ M   | 329 nm                        | 360.507                     | 1:1.0:1.0                     | 330 nm                        | 305.048                     | 490.047                     |
| 1.5 $\mu$ M   | 332 nm                        | 493.374                     | 1:1.5:1.5                     | 330 nm                        | 337.505                     | 622.914                     |
| 2.0 $\mu$ M   | 331 nm                        | 636.819                     | 1:2.0:2.0                     | 330 nm                        | 371.111                     | 766.359                     |
| 2.5 $\mu$ M   | 330 nm                        | 794.774                     | 1:2.5:2.5                     | 331 nm                        | 400.263                     | 924.314                     |
| 3.0 $\mu$ M   | 330 nm                        | 868.676                     | 1:3.0:3.0                     | 330 nm                        | 410.817                     | 998.216                     |
| 3.5 $\mu$ M   | 330 nm                        | 979.728                     | 1:3.5:3.5                     | 327 nm                        | 433.156                     | 1109.270                    |

<sup>a</sup>Fluorescence maximum wavelength of BHLN and Uase

<sup>b</sup>Fluorescence intensity of BHLN and Uase at maximum wavelength

<sup>c</sup>Fluorescence maximum wavelength of BSA or the mixture of BHLN, Uase and BSA

<sup>d</sup>Fluorescence intensity of mixture of BHLN, Uase and BSA at maximum wavelength

<sup>e</sup>Fluorescence intensity of BHLN and Uase plus fluorescence intensity of BSA at maximum wavelength

**Table S10.** Fluorescence intensity at maximum wavelength when the mixture of Uase, BHLNM and BSA was set at different ratios.

| BHLNM+Uase        |                    |         | Mixture of BHLNM, Uase and BSA |                    |         |          |
|-------------------|--------------------|---------|--------------------------------|--------------------|---------|----------|
| Concentration     | $\lambda_{\max}^a$ | $F_1^b$ | Ratio<br>(BSA:BHLN:Uase)       | $\lambda_{\max}^c$ | $F_2^d$ | $F_3^e$  |
| -                 | -                  | -       | 1:0 (BSA 1.0 $\mu\text{M}$ )   | 340 nm             | 129.540 | -        |
| 0.5 $\mu\text{M}$ | 336 nm             | 189.447 | 1:0.5:0.5                      | 336 nm             | 217.134 | 318.987  |
| 1.0 $\mu\text{M}$ | 329 nm             | 352.917 | 1:1.0:1.0                      | 329 nm             | 288.718 | 482.457  |
| 1.5 $\mu\text{M}$ | 333 nm             | 485.100 | 1:1.5:1.5                      | 333 nm             | 342.155 | 614.64   |
| 2.0 $\mu\text{M}$ | 330 nm             | 628.225 | 1:2.0:2.0                      | 330 nm             | 374.712 | 757.765  |
| 2.5 $\mu\text{M}$ | 328 nm             | 787.505 | 1:2.5:2.5                      | 328 nm             | 407.303 | 917.045  |
| 3.0 $\mu\text{M}$ | 329nm              | 865.104 | 1:3.0:3.0                      | 329 nm             | 412.373 | 994.644  |
| 3.5 $\mu\text{M}$ | 330 nm             | 972.925 | 1:3.5:3.5                      | 330 nm             | 423.418 | 1102.470 |

<sup>a</sup>Fluorescence maximum wavelength of BHLNM and Uase

<sup>b</sup>Fluorescence intensity of BHLNM and Uase at maximum wavelength

<sup>c</sup>Fluorescence maximum wavelength of BSA or the mixture of BHLNM, Uase and BSA

<sup>d</sup>Fluorescence intensity of mixture of BHLNM, Uase and BSA at maximum wavelength

<sup>e</sup>Fluorescence intensity of BHLNM and Uase plus fluorescence intensity of BSA at maximum wavelength

## **Supplementary Figure S1**

**Figure S1. Effects of exterior factors on the catalytic activities of Uase, UHLN and UHLNM.**



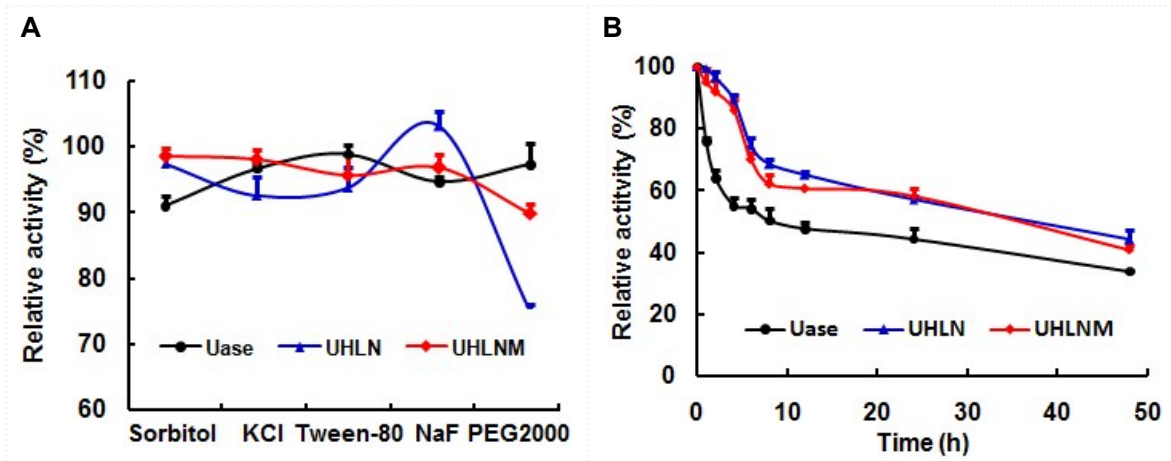

**Figure S1. Effects of exterior factors on the catalytic activities of Uase, UHLN and UHLNM.** The effects of (A) chemical agents (chemical stabilities) and (B) plasma (physiological stabilities) of Uase, UHLN and UHLNM. The original activity of Uase, UHLN and UHLNM was taken as 100%. The data were presented as mean  $\pm$  standard deviation, n = 3.
